# Supplementary material for: Systematic discovery of drug interaction mechanisms
Source: PubMed Central journal article supplement (PMC4422561; doi:10.15252/msb.20156098), 2015-04-29
Supplement: msb0011-0807-sd4.pdf [file msb0011-0807-sd4.pdf]

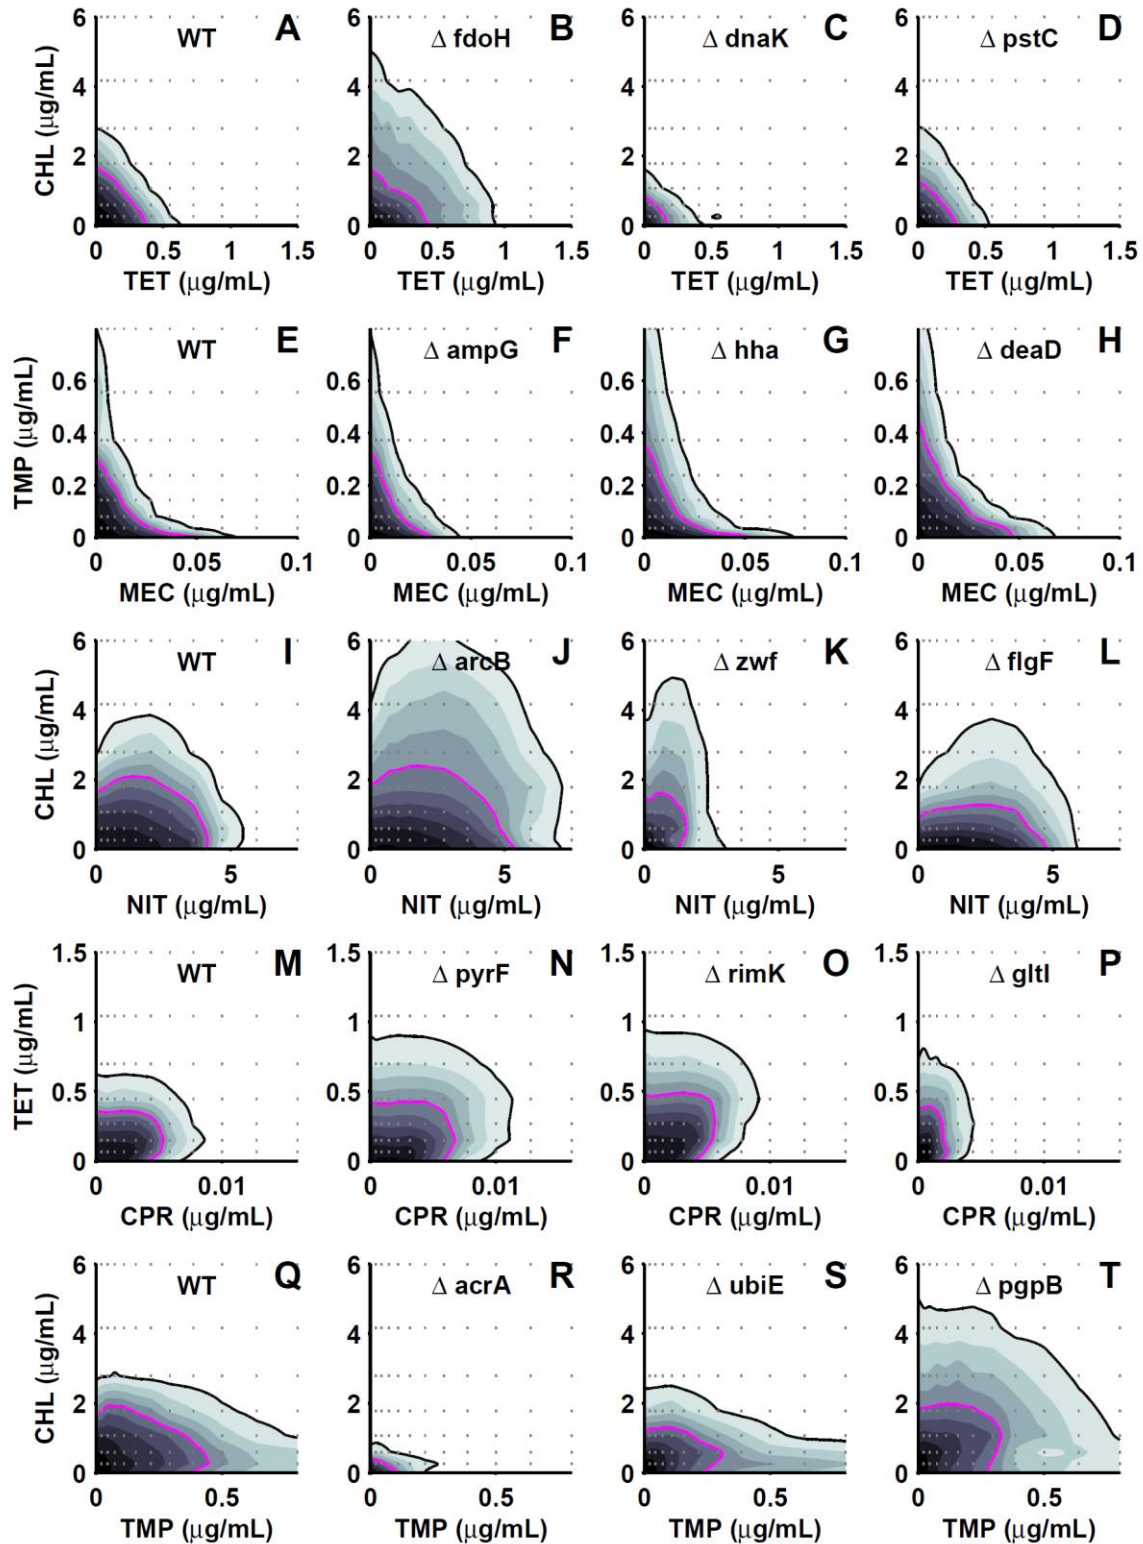

**Figure S4. Additional examples of mutants that do not affect drug interactions.** As Fig. 2A-F, for various mutants and drug pairs: (A-D) chloramphenicol-tetracycline, (E-H) trimethoprim-mecillinam, (I-L) chloramphenicol-nitrofurantoin, (M-P) tetracycline-ciprofloxacin, (Q-T) chloramphenicol-trimethoprim.
