# Supplementary material for: Systematic discovery of drug interaction mechanisms
Source: PubMed Central journal article supplement (PMC4422561; doi:10.15252/msb.20156098), 2015-04-29
Supplement: msb0011-0807-sd7.pdf [file msb0011-0807-sd7.pdf]

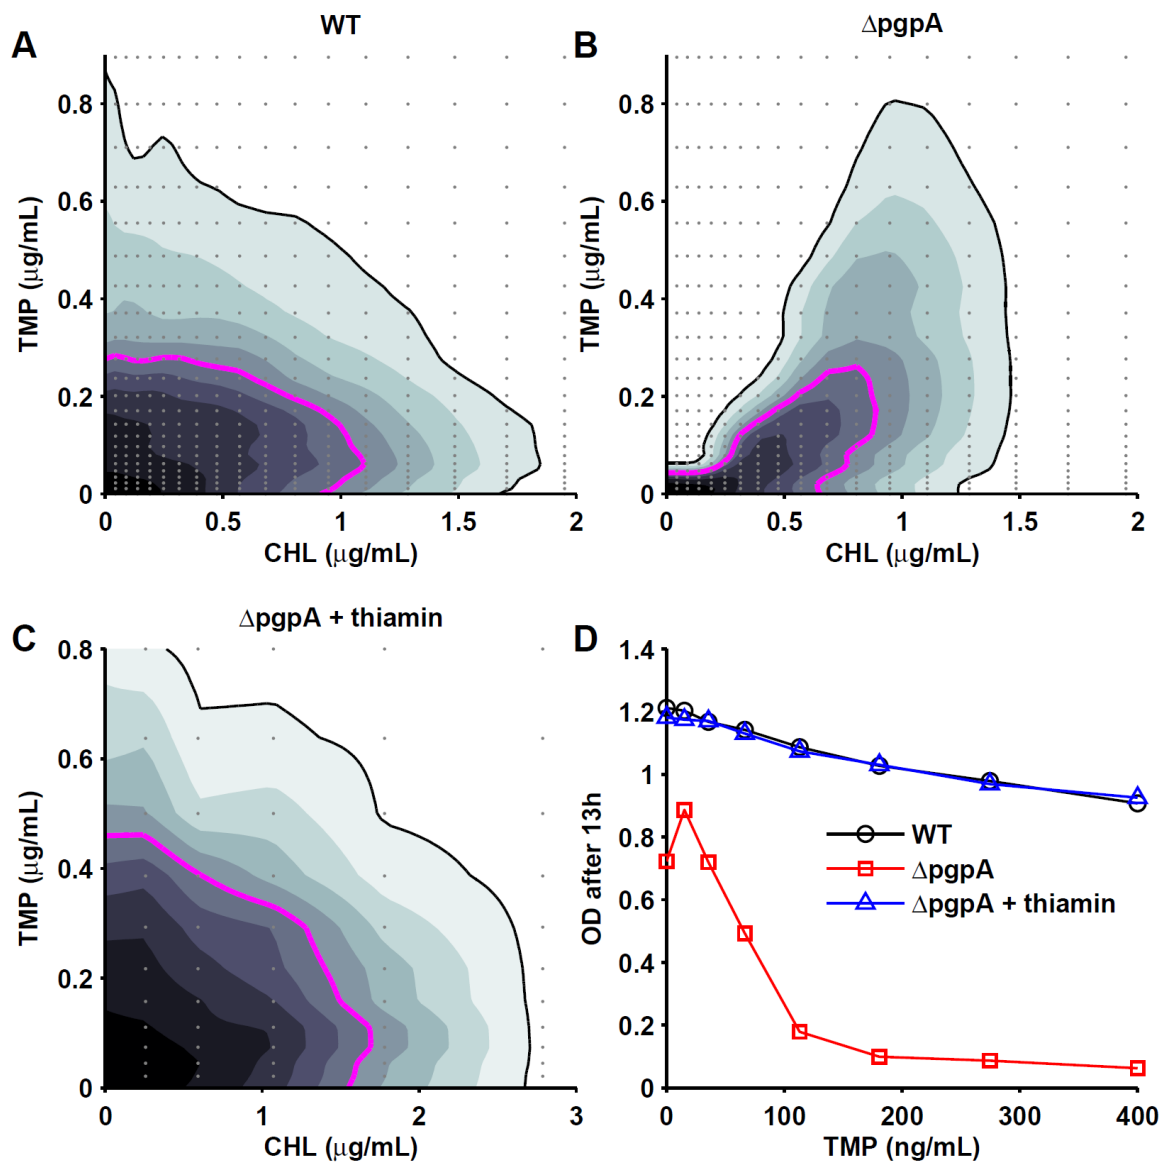

**Figure S7. A thiamin synthesis hypomorph mutant leads to reciprocal suppression.** Growth of WT (A) and  $pgpA$  deletion mutant (B) in two-dimensional chloramphenicol-trimethoprim concentration gradient (Materials and Methods). The antagonistic interaction in the WT becomes reciprocally suppressive in the  $pgpA$  mutant; at the same time, the  $pgpA$  mutant has greatly increased sensitivity to trimethoprim. This effect is due to truncation of the neighboring thiamin synthesis gene  $thiL$  which is essential, has overlapping open reading frame with  $pgpA$  (Keseler *et al.*, 2005) and thus likely becomes hypomorphic as a result of  $pgpA$  deletion. (C) As B but supplemented with thiamin pyrophosphate at 80ng/mL (Materials and Methods): reciprocal suppression in  $pgpA$  mutant reverts to an antagonistic drug interaction similar to WT (A). Experiment was done on a different day and with different concentration sampling than those in A,B, leading to slight differences in MICs. (D) Trimethoprim dose-response curves (OD after 13h) of WT and  $pgpA$  mutant with and without supplementation of thiamin as in C; trimethoprim sensitivity of the  $pgpA$  mutant is completely rescued by thiamin supplementation.
